# Supplementary material for: Engineering a platelet-rich plasma-based multifunctional injectable hydrogel with photothermal, antibacterial, and antioxidant properties for skin regeneration
Source: Royal Society of Chemistry journal article supplement (doi:10.1039/d3bm00881a), 2023-01-01
Supplement: d3bm00881a1.pdf [file d3bm00881a1.pdf]

## **Engineering platelet-rich plasma based multifunctional injectable hydrogel with photothermal, antibacterial, and antioxidant properties for skin regeneration**

Vajihe Alinezhad<sup>a</sup>, Kimia Esmacilzadeh<sup>b</sup>, Hadi Bagheri<sup>c</sup>, Habib Zeighami<sup>d</sup>, Ali Kalantari-Hesari<sup>e</sup>, Rahim Jafari,<sup>b</sup> Pooyan Makvandi,<sup>f</sup> Yi Xu,<sup>g</sup> Hamid Reza Mohammadi,<sup>h,i</sup> Mohammad-Ali Shahbazi,<sup>j,k</sup> Aziz Maleki<sup>c, a\*</sup>

<sup>a</sup>Department of Pharmaceutical Nanotechnology, School of Pharmacy, Zanjan University of Medical Sciences, 45139-56184 Zanjan, Iran

<sup>b</sup>Departments of Medical Nanotechnology, Faculty of Medicine, Zanjan University of Medical Sciences, Zanjan, Iran

<sup>c</sup>Zanjan Pharmaceutical Nanotechnology Research Center (ZPNRC), Zanjan 45139-56184, Iran

<sup>d</sup>Department of Microbiology, School of Medicine, Zanjan University of Medical Sciences, Zanjan 45139-56184, Iran

<sup>e</sup>Department of Pathobiology, Faculty of Veterinary Science, Bu-Ali Sina University, Hamadan 6516738695, Iran

<sup>f</sup>School of Engineering, Institute for Bioengineering, The University of Edinburgh, Edinburgh, EH9 3JL UK

<sup>g</sup>Department of Science & Technology, Department of Urology, The Quzhou Affiliated Hospital of Wenzhou Medical University, Quzhou People's Hospital, China

<sup>h</sup>Pharmaceutical Sciences Research Center, Hemoglobinopathy Institute, Mazandaran University of Medical Sciences, Sari, Iran

<sup>i</sup>Department of Toxicology/Pharmacology, Faculty of Pharmacy, Mazandaran University of Medical Sciences, Sari, Iran

<sup>j</sup>Department of Biomedical Engineering, University Medical Center Groningen, University of Groningen, Antonius Deusinglaan 1, 9713 AV Groningen, The Netherlands

<sup>k</sup>W.J. Kolff Institute for Biomedical Engineering and Materials Science, University of Groningen, University Medical Center Groningen, Antonius Deusinglaan 1, 9713 AV Groningen, The Netherlands

\* Corresponding author: email, [Maleki@zums.ac.ir](mailto:Maleki@zums.ac.ir)

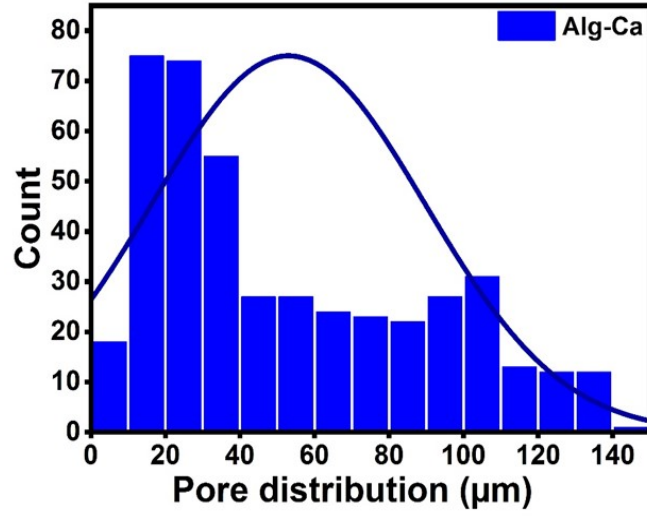

Fig.S1 Pore distribution of Alg-Ca hydrogel.

**Results**

|                                     | Mean (mV)     | Area (%) | St Dev (mV) |
|-------------------------------------|---------------|----------|-------------|
| <b>Zeta Potential (mV): -22.1</b>   | Peak 1: -22.1 | 100.0    | 8.74        |
| <b>Zeta Deviation (mV): 8.74</b>    | Peak 2: 0.00  | 0.0      | 0.00        |
| <b>Conductivity (mS/cm): 0.0103</b> | Peak 3: 0.00  | 0.0      | 0.00        |
| <b>Result quality : Good</b>        |               |          |             |

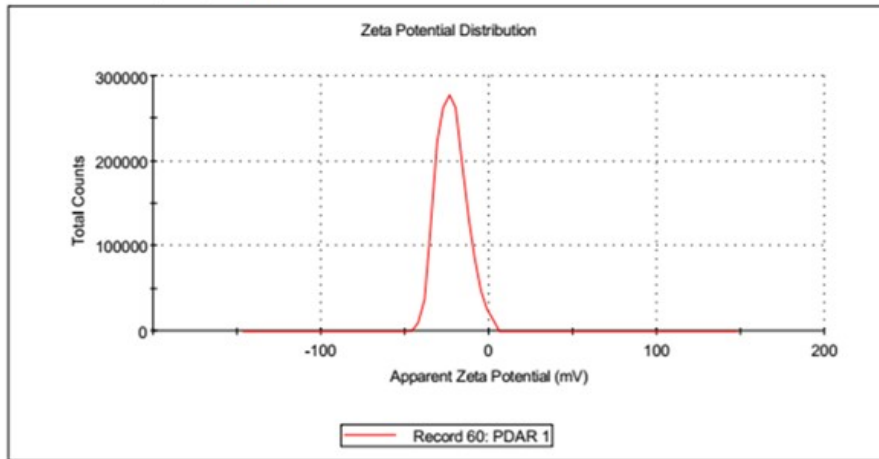

Fig.S2 Zeta Potential of polydopamine NPs.

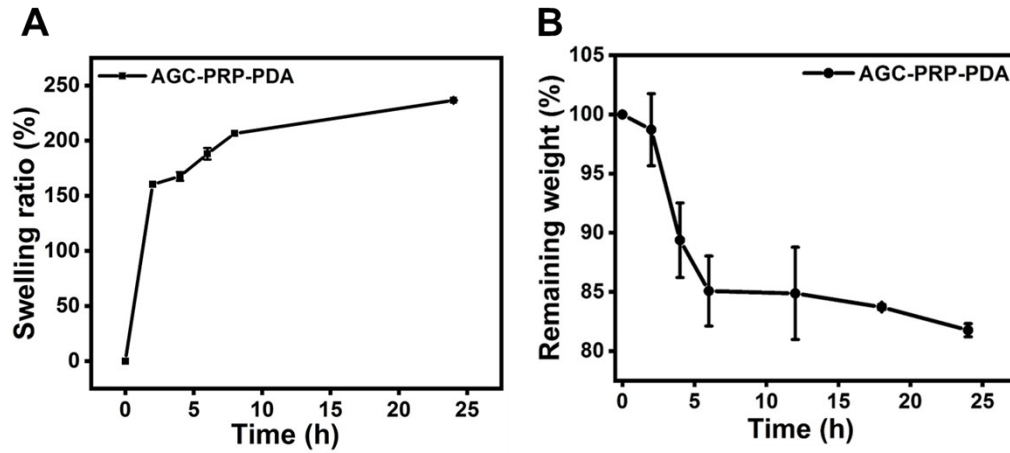

**Fig. S3** (A) Swelling and (B) *in vitro* degradation profile of AGC-PRP-PDA hydrogel.

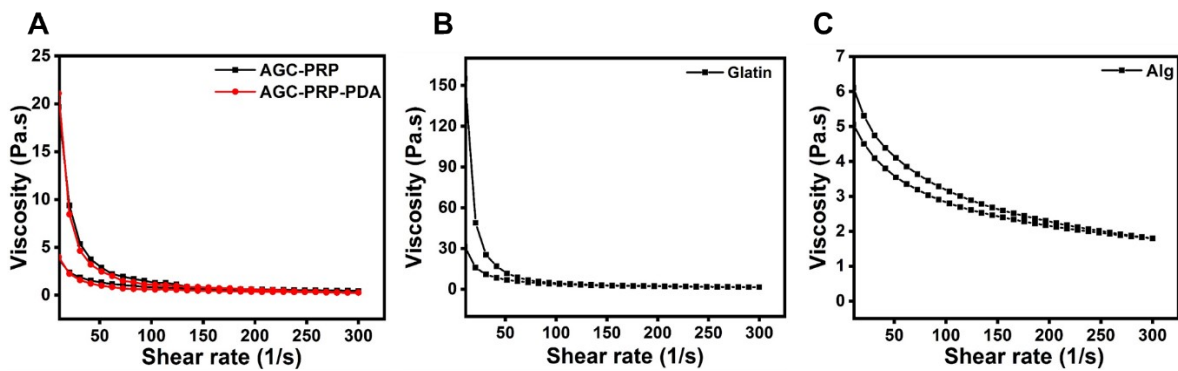

**Fig. S4** Rheological behavior of (A) AGC-PRP with/without PDA. (B) Gelatin 15% (w/v). (C) Alginate 2.5% (w/v).

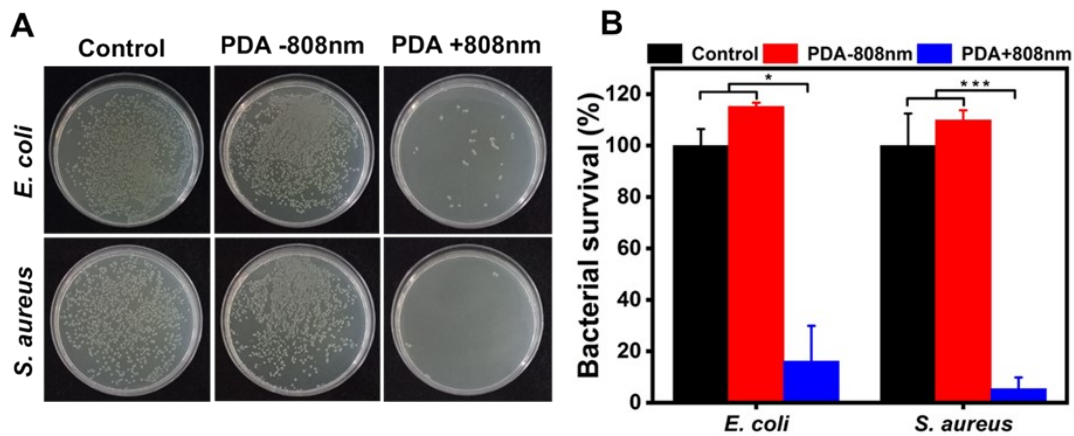

**Fig. S5** Antibacterial activity of polydopamine NPs against *E. coli* and *S. aureus* in LB medium mean  $\pm$  SD, n=3,  $\rho < 0.05$ ,  $\rho < 0.001$ ).

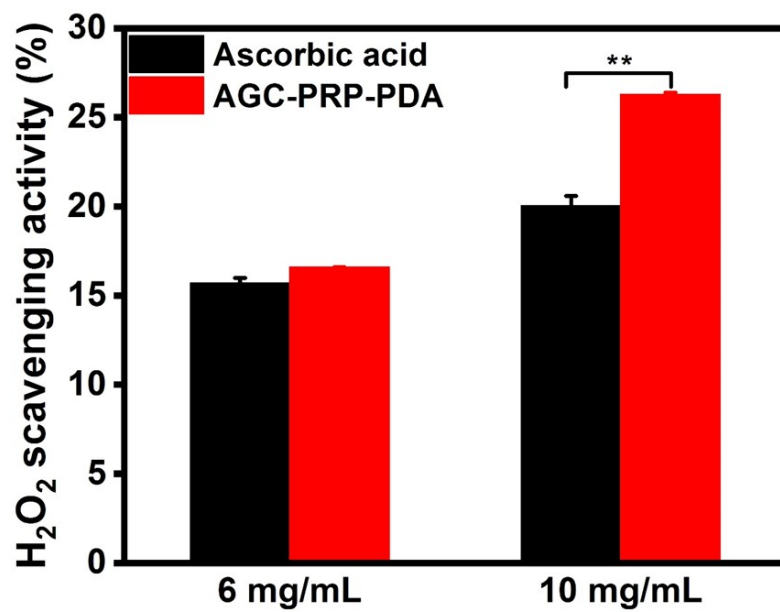

**Fig. S6** H<sub>2</sub>O<sub>2</sub> scavenging of AGC-PRP-PDA hydrogel and ascorbic acid. \*\*  $\rho < 0.01$

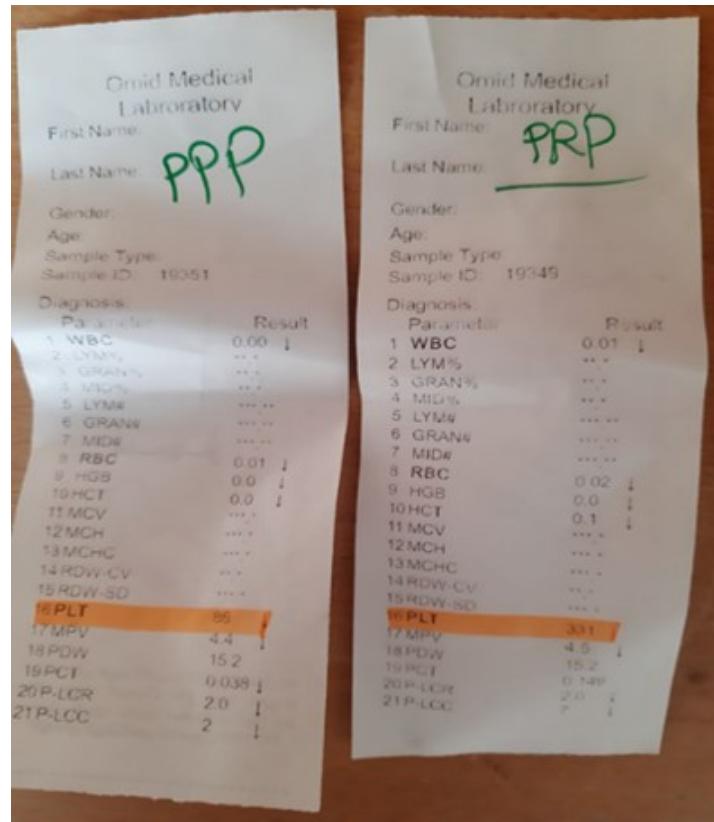

Fig. S7 The amount of platelets at similar volume. of PPP and PRP fractions

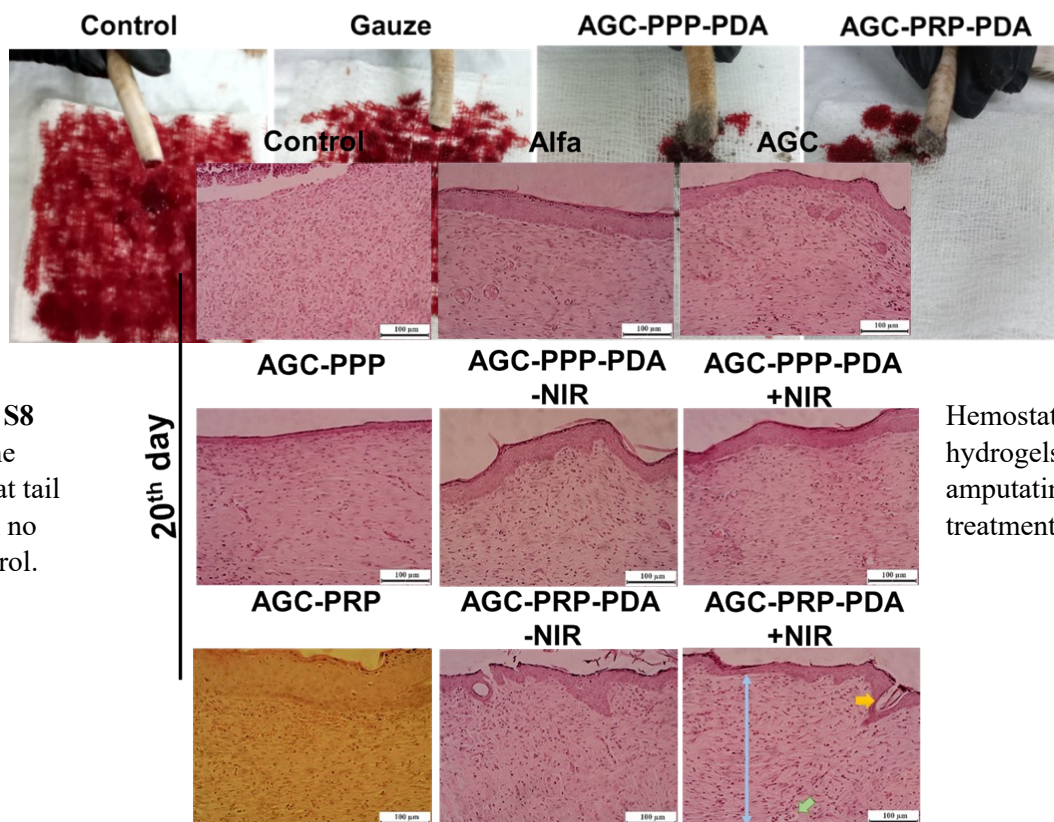

Fig. S8 of the on rat tail with no control.

Hemostatic images hydrogels or gauze amputating wounds treatment as a

**Fig. S9** H&E analysis of the of wound areas after 20 day of the different treatments. Yellow, green, and two-sided arrows show a hair follicle, blood vessel, and thickness of dermis layer.

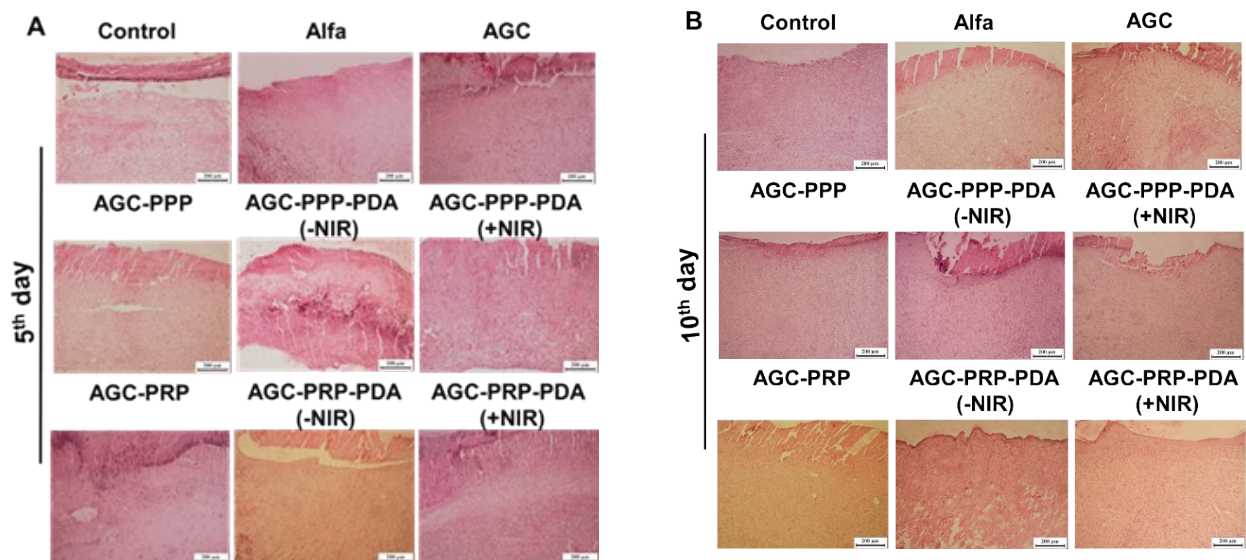

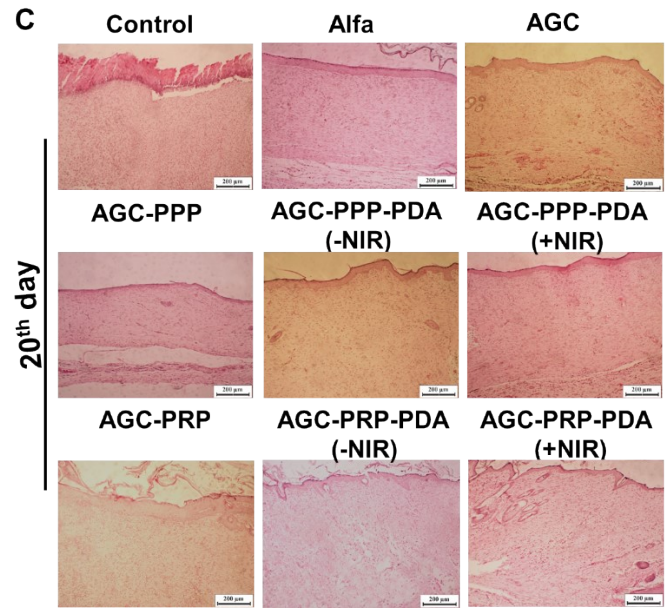

**Fig. S10** Histological analysis of wound area with H&E staining after A) 5th, B) 10th , and C) 20 day of therapy for all groups, scale bar: 100 $\mu$ m.
